# Supplementary material for: LncRNA LINC00518 Acts as an Oncogene in Uveal Melanoma by Regulating an RNA-Based Network
Source: Cancers (Basel). 2020 Dec 21;12(12):3867. doi: 10.3390/cancers12123867 (PMC7767460; doi:10.3390/cancers12123867)
Supplement: Supplementary file 1 [file cancers-12-03867-s001.xlsx]

## Sheet: Table S1
	92.1						MEL270
	IL6			HGF			IL6			HGF
Transcript	24h	48h	Correlation with LINC00518	24h	48h	Correlation with LINC00518	24h	48h	Correlation with LINC00518	24h	48h	Correlation with LINC00518
CDH1	-1.17 (0.51)	-2.19 (0.04)	N/A	1.03 (0.91)	-1.23 (0.73)	N/A	1.04 (0.91)	-1.12 (0.53)	N/A	1.2 (0.62)	-1.08 (0.31)	N/A
LINC00518	2.53 (0.03)	3.53 (0.006)	N/A	1.58 (0.71)	1.84 (0.03)	N/A	1.14 (0.01)	1.51 (0.04)	N/A	-1.07 (0.81)	-1.09 (0.62)	N/A
VIM	2.04 (0.03)	2.51 (0.03)	N/A	1.83 (0.37)	2.4 (0.04)	N/A	-1.09 (0.39)	1.86 (0.04)	N/A	1.2 (0.25)	1.02 (0.95)	N/A
ZEB2	2.09 (0.07)	2.07 (0.03)	N/A	1.2 (0.84)	1.37 (0.25)	N/A	1.33 (0.003)	1.51 (0.03)	N/A	1.11 (0.47)	-1.07 (0.51)	N/A
LINGO2	1.06 (0.92)	2.87 (0.13)	0.73 (0.007)	-1.31 (0.12)	1.54 (0.03)	0.2 (0.53)	1.19 (0.03)	1.28 (0.04)	0.78 (0.002)	N/A	N/A	N/A
NFIA	1.35 (0.007)	2.13 (0.04)	0.72 (0.008)	1.25 (0.005)	1.51 (0.006)	0.44 (0.15)	1.17 (0.49)	1.3 (0.04)	0.28 (0.37)	N/A	N/A	N/A
OTUD7B	1.03 (0.96)	2.26 (0.12)	0.71 (0.009)	-1.15 (0.08)	1.59 (0.15)	0.12 (0.71)	1.22 (0.04)	1.39 (0.03)	0.81 (0.001)	N/A	N/A	N/A
SEC22C	1.02 (0.96)	1.41 (0.007)	0.54 (0.06)	-1.19 (0.12)	2.18 (0.005)	0.66 (0.01)	1.26 (0.04)	1.2 (0.06)	0.35 (0.26)	N/A	N/A	N/A
VAMP3	1.82 (0.03)	2.13 (0.004)	0.67 (0.01)	-1.24 (0.31)	2.99 (0.003)	0.59 (0.04)	1.24 (0.04)	1.56 (0.03)	0.34 (0.27)	N/A	N/A	N/A

## Sheet: Table S2
	92.1			MEL270
Transcript	24h	48h	Correlation with LINC00518	24h	48h	Correlation with LINC00518
LINC00518	1.48 (0.24)	1.79 (0.04)	N/A	1.48 (0.04)	1.09 (0.95)	N/A
VEGFA	5.99 (0.04)	18.24 (0.0001)	N/A	4.09 (0.0001)	3.09 (0.005)	N/A
LINGO2	3.37 (0.008)	7.57 (0.01)	0.68 (0.01)	1.67 (0.01)	2.42 (0.04)	-0.32 (0.31)
NFIA	1.07 (0.99)	4.53 (0.02)	0.63 (0.02)	2.17 (0.03)	2.98 (0.02)	-0.39 (0.21)
OTUD7B	2.29 (0.005)	5.99 (0.02)	0.68 (0.01)	-1.2 (0.07)	3.08 (0.04)	-0.05 (0.87)
SEC22C	1.04 (0.99)	1.48 (0.03)	0.8 (0.001)	1.17 (0.11)	2.25 (0.001)	0.62 (0.03)
VAMP3	-1.51 (0.08)	1.58 (0.11)	0.59 (0.04)	1.48 (0.53)	2.06 (0.01)	0.65 (0.02)

## Sheet: Table S3
miRNA	Correlation mRNA vs LINC00518	miRNA-binding sites on LINC00518
miR-143-3p	-0.54 (<0.0001)	2
miR-145-5p	-0.54 (<0.0001)	2
miR-199a-5p	-0.66 (<0.0001)	4
miR-212-5p	-0.64 (<0.0001)	2
miR-3191-3p	-0.47 (<0.0001)	4
miR-497-5p	-0.48(<0.0001)	2

## Sheet: Table S4
mRNA	Correlation mRNA vs LINC00518	miRNA	Correlation mRNA vs miRNA
AHCYL2	0.75 (4.50E-14)	miR-212-5p	-0.64 (<0.0001)
		miR-3191-3p	-0.4 (0.0002)
CRTAP	0.54 (2.20E-06)	miR-199a-5p	-0.5 (<0.0001)
ENTPD1	0.59 (1.10E-07)	miR-3191-3p	-0.26 (0.02)
F11R	0.52 (8.42E-06)	miR-145-5p	-0.44 (<0.0001)
IFFO2	0.51 (0.00001)	miR-145-5p	-0.33 (0.003)
		miR-212-5p	-0.47 (<0.0001)
IP6K1	0.56 (6.93E-07)	miR-145-5p	-0.39 (0.0002)
		miR-3191-3p	-0.32 (0.003)
KCTD15	0.47 (0.00009)	miR-3191-3p	-0.26 (0.01)
KLF8	0.49 (0.00003)	miR-143-3p	-0.34 (0.002)
LINGO2	0.56 (7.73E-07)	miR-497-5p	-0.43 (<0.0001)
NFIA	0.69 (3.05E-11)	miR-143-3p	-0.57 (<0.0001)
OTUD7B	0.68 (8.24E-11)	miR-145-5p	-0.41 (0.0001)
		miR-497-5p	-0.31 (0.004)
RAB43	0.64 (3.74E-09)	miR-3191-3p	-0.42(<0.0001)
RABGAP1L	0.42 (0.0006)	miR-212-5p	-0.39 (0.0002)
SEC22C	0.74 (1.81E-13)	miR-199a-5p	-0.71 (<0.0001)
		miR-212-5p	-0.53 (<0.0001)
SEMA6A	0.49 (0.00002)	miR-497-5p	-0.29 (0.01)
VAMP3	0.52 (7.64E-06)	miR-3191-3p	-0.37 (0.0006)
ZBTB20	0.6 (6.00E-08)	miR-199a-5p	-0.47 (0.0001)

## Sheet: Table S5
miRNA	PMID/doi	Tumor model	Effects of miRNA ectopic expression
miR-143-3p	24616567	gastric cancer	decreased cell viability in vitro
	30536996	colon cancer	decreased migration and invasion ability in vitro
	29330462	osteosarcoma	decreased cell proliferation, migration and invasion in vitro; decreased tumor growth and metastasis in vivo
	27358073	esophageal squamous cell carcinoma	decreased cell proliferation, migration and invasion in vitro; decreased tumor growth and increased apoptosis in vivo
	29360495	breast cancer	decreased cell proliferation and migration in vitro
	28559978	breast cancer	decreased cell proliferation, invasion and migration in vitro
miR-145-5p	32874130	gastric cancer	decreased cell proliferation, invasion and migration in vitro
	30694767	breast cancer	decreased cell proliferation, invasion and migration in vitro; decreased tumor growth and metastasis in vivo
	32366274	ovarian cancer	decreased cell proliferation and migration, and increased cell death in vitro
	31106707	hepatocellular carcinoma	decreased cell proliferation and migration, and increased apoptosis in vitro
	24781864	thyroid cancer	decreased cell proliferation, invasion and migration, and increased apoptosis in vitro; decreased tumor growth and metastasis in vivo
miR-199a-5p	29807462	triple negative breast cancer	decreased cell proliferation, invasion and migration, and increased apoptosis in vitro; decreased tumor progression in vivo
	32705201	colorectal cancer	decreased cell proliferation, invasion and migration in vitro
	31258753	non-small cell lung cancer	decreased cell proliferation in vitro; decreased tumor growth in vivo
	31681604	glioma	decreased cell proliferation, migration and sensitivity to TMZ treatment in vitro; decreased tumor growth in vivo
miR-212-5p	29216628	breast cancer	decreased cell proliferation, invasion and EMT in vitro; decreased tumorigenesis and metastasis in vivo
	30556883	acute myeloid leukemia	decreased cell proliferation, increased apoptosis in vitro
	doi:10.21037/tcr-20-2007	liver cancer	decreased cell proliferation, increased apoptosis in vitro; decreased tumor growth in vivo
miR-3191-3p	no data available
miR-497-5p	29265919	Osteosarcoma	decreased cell proliferation, increased apoptosis and cell cycle arrest in vitro
	31441605	hepatocellular carcinoma	decreased cell proliferation and metastasis in vitro; decreased tumor growth and metastasis, and increased survival rate in vivo
	30867780	non-small cell lung cancer	decreased cell proliferation and invasion in vitro
	31409724	gastric cancer	decreased cell proliferation and colony formation ability, increased cell cycle block and apoptosis in vitro
	32046519	ovarian cancer	increased apoptosis in vitro

## Sheet: Table S6
TF	Position	Genomic size	Correlation with LINC00518
KDM1A	chr6:10438069-10438584	516	0.409 (0.0001)
MITF	chr6:10435567-10435986	420	0.251 (0.025)

## Sheet: Table S7
Patient	Age	Sex	Tumor diameter (mm)	Tumor thickness (mm)	Cell type	Location	Scleral invasion	Optic nerve invasion	Pathological T stage
1	61	M	18	10	spindle	choroid	No	no	pT3a
2	73	M	40	5.3	epithelioid	choroid and ciliary body	Yes	no	pT4d
3	79	M	15	14	mixed	choroid and ciliary body	No	no	pT3b
4	48	F	37	7	mixed	choroid	Yes	no	pT4a
5	74	M	18	16	epithelioid	choroid and ciliary body	No	no	pT4b
6	55	F	7	5	spindle	choroid	Yes	yes	pT1a
7	78	M	17	9	epithelioid	choroid and ciliary body	No	no	pT3b
8	73	M	15	11	epithelioid	choroid	Yes	no	pT3a
9	67	M	19	17	spindle	choroid and ciliary body	No	no	pT4b
10	48	F	16	12	mixed	choroid and ciliary body	No	no	pT3b
11	77	M	13	12	mixed	choroid and ciliary body	No	no	pT2a
12	71	M	15	13	epithelioid	choroid	No	no	pT3
13	82	M	15	13	mixed	choroid and ciliary body	No	no	pT3b
14	73	M	11	6	epithelioid	choroid	No	no	pT2a
15	57	F	10	7	mixed	choroid and ciliary body	No	no	pT2b
16	72	F	10	7	epithelioid	choroid	No	no	pT2a
17	72	M	17	11	mixed	choroid	No	no	pT3a
18	67	F	15	6	mixed	choroid and ciliary body	No	no	pT2b
19	51	F	13	11	mixed	choroid	No	no	pT3a
20	62	M	14	12	mixed	choroid	No	no	pT3a
21	85	F	12	8	spindle	choroid and ciliary body	No	no	pT2d
22	54	M	12	7	mixed	choroid	Yes	no	pT2a
23	84	F	15	12	mixed	choroid	No	no	pT3a
24	52	M	12	7	spindle	choroid and ciliary body	No	no	pT2b
25	80	F	13	8	epithelioid	choroid	No	no	pT3a
26	54	F	16	13	mixed	choroid and ciliary body	No	no	pT4b
27	72	F	15	13	mixed	choroid and ciliary body	No	no	pT3b
28	81	F	14	10	spindle	choroid	No	no	pT3a
29	19	M	16	4	mixed	choroid	No	no	pT3a
30	43	F	18	14	mixed	choroid	No	no	pT4a
31	73	M	15	13	mixed	choroid	No	no	pT3a
32	70	M	13	12	mixed	choroid and ciliary body	No	no	pT3b
33	60	M	14	8	spindle	choroid	Yes	yes	pT3c
34	71	M	9.3	7.2	mixed	choroid	Yes	no	pT2a
35	40	M	12	10.9	spindle	choroid and ciliary body	No	no	pT3b
36	37	M	11	6.8	spindle	choroid	No	no	pT2a
37	29	M	4.3	3.4	epithelioid	choroid	No	no	pT1c
38	74	F	19	18	mixed	choroid and ciliary body	No	no	pT4b
39	79	F	18	10	mixed	choroid	No	no	pT3a
40	55	M	20	13	epithelioid	choroid	Yes	yes	pT4a
41	78	M	17	10	mixed	choroid	No	no	pT3a

## Sheet: Table S8
Transcript	Forward primer	Reverse primer
AGAP2-AS1	ACCCAGAGCAATCCGAGTGT	GTGGGTACGTGAGCTCCCTC
AHCYL2	ATGCTCCTGAGGGTCGCTAT	GTCAGCTCTGTCAAGTGGGC
BAP1	TTGGTGGATGATACGTCCGTG	CGCTCAGCAAGGCATGAGT
CD27-AS1	TGACATAAGGTTGGAGTGCAG	GATGCCAAGAAGGAATTTGTCCC
CDH1	TGAGTGTCCCCCGGTATCTTC	CAGTATCAGCCGCTTTCAGATTTT
CDR1-AS	ACGTCTCCAGTGTGCTGA	CTTGACACAGGTGCCATC
CECR5-AS1	GACTGCGCACGTGAGTCC	CCAGCTGGCTCCTTGTACTACATT
CRTAP	GTGTGAAGAGAACCTCACCCC	GGCTGCATTCTTCAGGTCGT
ENTPD1	TTCATTGGCAAGATCCAGGGC	AGTGGGAGAGAGGTGTGGAC
F11R	CTATAGCCGAGGCCACTTTGAC	ACACCAGGAATGACGAGGTCT
GAPDH	TGCACCACCAACTGCTTAGC	GGCATGGACTGTGGTCATGAG
HPRT1	TGACACTGGCAAAACAATGCA	GGTCCTTTTCACCAGCAAGCT
IFFO2	ATCAAAGGCTCCGCAGACAG	CCTCGCGCTCGAACTCATC
IP6K1	GTGACCACAAGGAGGAGAAAGC	ACTCAAGCCACTGTTGCCATC
KCTD15	GCTCAACTCGGTACAGGATGTTC	GGGTGTCAAATGAAGCACGC
KLF8	TTCAGAAGGTGGCTCAATGCA	GTTCTCCATGGGGTTGGCAT
LINC00152 (CYTOR)	AACTTGCCAGCCTCCATCCA	GAGCTTCCTGTTTCATCTCCCAG
LINC00240	GATGCTCTAGGAGAAGCCAGC	TTTCCATGTGGTTAGCTTGAGCC
LINC00518	TCACCAGCCTGAGGTAGGAA	GGATGTGGTGGAAAACCCCT
LINC00634	GCGTGAGCCAAGGCCG	CCCACCAGAATGAGGACCGA
LINC01278	CCCCCACAGATACCGACTGA	CTGGAACCAGGGTTGCAAGA
LINGO2	CACATGAGCCTGGAAATAGGGT	GTTGGGCTCTTCATGCTGGT
MALAT1	TAGCTTGGATCCTTGTGGGC	AACCCACCAAAGACCTCGAC
MET	GCCAACCGAGAGACAAGCAT	ACACCTGTTATTGTGCTCCCAC
MITF	CCCAGGCATGAACACACATTCA	GATCCATCAAGCCCAAGATTTCCT
NFIA	GTGGAGCCAGGAATGCCATC	TCGGTGATGCTGTGTGAACG
OTUD7B	GGGGAAGCATTTGCCCCTATT	GAGTGCAGAAAAGTGGGCCT
RAB43	CCGGACGAGCAGTACGATTT	TGCAGCTTGACCCGCTTG
RABGAP1L	AGTTGGTGGAGGCCAAGTGTA	CCAAGAGTTTTTCGCAGCTTGG
SEC22C	TTCTTGTTCCTTTCGTAGCCTGC	AGCAGCATAAGCACCACCTTC
SEMA6A	AGACAGGCCGATGTAGACACA	GGGTTGAAGGCATTAGTTCCA
SLCO4-AS1	CAGGCAGAGCAGGATGAACG	GACGCAGGGGTTCAAGTCAG
SRF	GCGGCGCTACACGACCTTCA	TGGCCACCAGCAACAGCACC
TPT1-AS1	CACCACTTACAGTTTTCAGCTCCT	GACGAGAGCAAGGAGAGGCT
TTC28-AS1	TCTGGGCAGCCTACGCTTT	GGCGTTGGTTCATGTCTTTCC
TYR	AGGGATCTGCCAACGATCCTA	GGGTGCATTGGCTTCTGGAT
VAMP3	CAAGATGTGGGCAATCGGGA	ACAGCAGTTTTGAGTTCCGCT
VEGFA	GCACCCATGGCAGAAGG	CTCGATTGGATGGCAGTAGCT
VIM	CGAAAACACCCTGCAATCTT	CTGGATTTCCTCTTCGTGGA
ZBTB20	ACCGCCAAACAGAACTACGTC	AGAAGGAGCGCCAACAGATG
ZEB2	ATCGCAAGTTCAAATGCACAGA	CTCGTAAGGTTTTTCACCACTGT
